# Supplementary material
Source: publisher site journal article supplement (https://www.dovepress.com/article/366906)
Supplement: Supplementary file 1 [file get_supplementary_file.php]

## Supplementary materials

**Table S1:** Results of scenario analysis

**Figure S1:** Tornado diagram of multiple-PGx compared with no-PGx testing

**Figure S2:** Cost-effectiveness plane of no-PGx testing, single-PGx testing, and multiple-PGx testing.

**Table S1:** Results of scenario analysis

| Scenario                                      | Incremental cost (per patient) | Incremental QALY (per patient) | ICER (Cost/QALY) |
|-----------------------------------------------|--------------------------------|--------------------------------|------------------|
| Base case (30-year-old)                       | -23,598                        | 0.11                           | -209,272         |
| Prevalence of <i>HLA-B*57:01</i> =1.1% (-84%) | -25,119                        | 0.09                           | -292,523         |
| Prevalence of <i>HLA-B*57:01</i> =9.5% (+42%) | -22,831                        | 0.13                           | -180,749         |
| Prevalence of <i>HLA-B*13:01</i> =0% (-100%)  | -27,157                        | 0.07                           | -394,041         |
| Prevalence of <i>HLA-B*13:01</i> =28% (+56%)  | -21,576                        | 0.14                           | -156,730         |
| Prevalence of <i>NAT2</i> = 10% (-76%)        | -25,146                        | 0.09                           | -295,284         |
| Prevalence of <i>NAT2</i> = 66% (+268%)       | -22,376                        | 0.13                           | -166,322         |
| PPV_ABC = 0.302 (-50%)                        | -26,229                        | 0.09                           | -290,594         |
| PPV_ABC = 0.906 (+50%)                        | -20,970                        | 0.14                           | -155,057         |
| PPV_Co-trimoxazole = 0.2 (-50%)               | -22,616                        | 0.09                           | -254,681         |
| PPV_Co-trimoxazole = 0.6 (+50%)               | -24,580                        | 0.14                           | -179,779         |
| PPV_INH = 0.334 (-50%)                        | -24,603                        | 0.09                           | -260,034         |
| PPV_INH = 1 (+50%)                            | -22,590                        | 0.13                           | -172,519         |

**Abbreviations:** ABC, abacavir; ICER, incremental cost-effectiveness ratio; INH, isoniazid; NAT2, N-Acetyltransferase 2; PPV, Positive Predictive value; QALY, Quality-Adjusted Life Year.

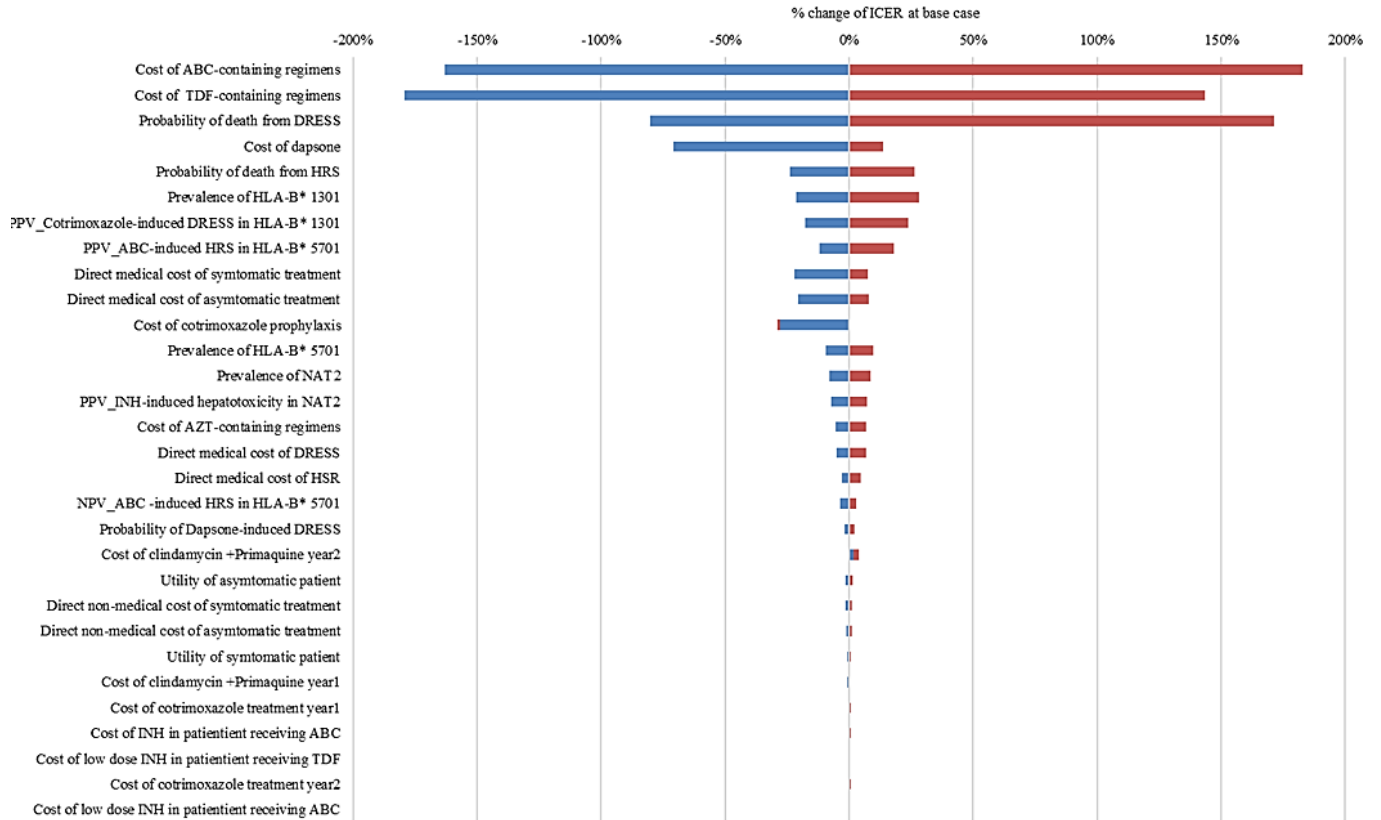

**Figure S1:** Tornado diagram of multiple-PGx compared with no-PGx testing

**Abbreviations:** ABC, abacavir; ADR, Adverse Drug Reaction; ART, Antiretroviral therapy; AZT, zidovudine; DRESS, Drug Rash with Eosinophilia and Systemic Symptoms; DTG, Dolutegravir, EFV, Efavirenz; FTC, Emtricitabine; HSR, hypersensitivity reaction; HLA, human leukocyte antigen; INH, isoniazid; NAT2, N-Acetyltransferase 2; NPV, Negative Predictive Value; NGS, Next Generation Sequencing; PCP, Pneumocystis pneumonia; PPV, Positive Predictive Value; NPV, Negative Predictive value TB; PGx, pharmacogenetic; Tuberculosis; TDF, Tenofovir.

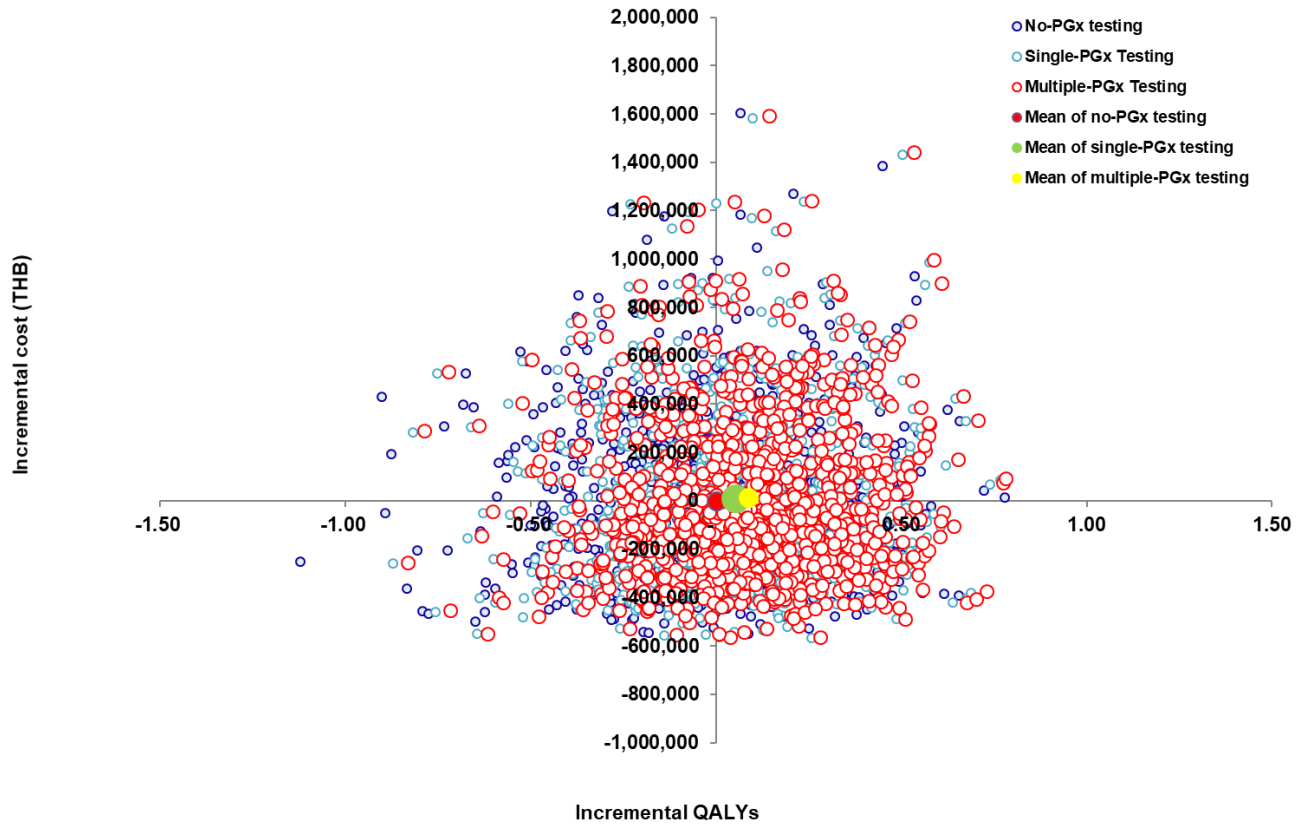

**Figure S2:** Cost-effectiveness plane of no-PGx testing, single-PGx testing, and multiple-PGx testing.

**Abbreviations:** PGx, pharmacogenetic; QALYs, Quality Adjusted Life Years
